# Supplementary material for: Exploring binding preferences in co-crystals of conformationally flexible multitopic ligands
Source: Royal Society of Chemistry journal article supplement (doi:10.1039/c7ce01177f), 2017-01-01
Supplement: c7ce01177f1.pdf [file c7ce01177f1.pdf]

# **Exploring binding preferences in co-crystals of conformationally flexible multitopic ligands**

*Erika L. Krueger, Abhijeet Sinha, John Desper, and Christer B.  
Aakeröy*

*Department of Chemistry, Kansas State University, Manhattan, KS 66506*

*[aakeroy@ksu.edu](mailto:aakeroy@ksu.edu)*

## **Supplementary Information**

## Table of content

|                          |   |
|--------------------------|---|
| 1. Crystallographic data | 3 |
|--------------------------|---|

**Table 1.** Crystallographic data for the cocrystals.

| Code                          | <b>3,4:Mal</b>                                                                                        | <b>2,3:Adp</b>                                                                                                      | <b>3,4:Suc.H<sub>2</sub>O</b>                                                                                            | <b>2,3:Azl</b>                                                                                         | <b>2,3:Mal</b>                                                                                        |
|-------------------------------|-------------------------------------------------------------------------------------------------------|---------------------------------------------------------------------------------------------------------------------|--------------------------------------------------------------------------------------------------------------------------|--------------------------------------------------------------------------------------------------------|-------------------------------------------------------------------------------------------------------|
| Formula moiety                | (C <sub>12</sub> H <sub>10</sub> N <sub>4</sub> O)<br>(C <sub>3</sub> H <sub>4</sub> O <sub>4</sub> ) | (C <sub>12</sub> H <sub>10</sub> N <sub>4</sub> O) <sub>2</sub><br>(C <sub>6</sub> H <sub>10</sub> O <sub>4</sub> ) | (C <sub>12</sub> H <sub>10</sub> N <sub>4</sub> O)<br>(C <sub>4</sub> H <sub>6</sub> O <sub>4</sub> ) (H <sub>2</sub> O) | (C <sub>12</sub> H <sub>10</sub> N <sub>4</sub> O)<br>(C <sub>9</sub> H <sub>16</sub> O <sub>4</sub> ) | (C <sub>12</sub> H <sub>10</sub> N <sub>4</sub> O)<br>(C <sub>3</sub> H <sub>4</sub> O <sub>4</sub> ) |
| Empirical formula             | C <sub>15</sub> H <sub>14</sub> N <sub>4</sub> O <sub>5</sub>                                         | C <sub>30</sub> H <sub>30</sub> N <sub>8</sub> O <sub>6</sub>                                                       | C <sub>16</sub> H <sub>18</sub> N <sub>4</sub> O <sub>6</sub>                                                            | C <sub>21</sub> H <sub>26</sub> N <sub>4</sub> O <sub>5</sub>                                          | C <sub>15</sub> H <sub>14</sub> N <sub>4</sub> O <sub>5</sub>                                         |
| Molecular weight              | 330.30                                                                                                | 598.62                                                                                                              | 362.34                                                                                                                   | 414.46                                                                                                 | 330.30                                                                                                |
| Color, Habit                  | Colorless, Plate                                                                                      | Colorless, Prism                                                                                                    | Colorless, Plate                                                                                                         | Colorless, Prism                                                                                       | Colorless, Prism                                                                                      |
| Crystal system                | Triclinic                                                                                             | Triclinic                                                                                                           | Orthorhombic                                                                                                             | Triclinic                                                                                              | Triclinic                                                                                             |
| Space group, <i>Z</i>         | <i>P</i> $\bar{1}$ , 2                                                                                | <i>P</i> $\bar{1}$ , 1                                                                                              | <i>Pbca</i> , 8                                                                                                          | <i>P</i> $\bar{1}$ , 2                                                                                 | <i>P</i> $\bar{1}$ , 2                                                                                |
| <i>a</i> , Å                  | 7.0290(10)                                                                                            | 5.9660(5)                                                                                                           | 7.1160(8)                                                                                                                | 8.5041(12)                                                                                             | 8.0953(12)                                                                                            |
| <i>b</i> , Å                  | 10.5537(15)                                                                                           | 7.2613(6)                                                                                                           | 13.0840(16)                                                                                                              | 9.6723(14)                                                                                             | 9.9439(14)                                                                                            |
| <i>c</i> , Å                  | 10.8826(15)                                                                                           | 16.8960(14)                                                                                                         | 36.062(5)                                                                                                                | 14.013(2)                                                                                              | 10.1459(15)                                                                                           |
| $\alpha$ , °                  | 73.431(5)                                                                                             | 89.858(2)                                                                                                           | 90                                                                                                                       | 80.742(6)                                                                                              | 99.924(6)                                                                                             |
| $\beta$ , °                   | 76.424(5)                                                                                             | 80.013(3)                                                                                                           | 90                                                                                                                       | 81.368(6)                                                                                              | 106.674(6)                                                                                            |
| $\gamma$ , °                  | 71.357(5)                                                                                             | 79.638(2)                                                                                                           | 90                                                                                                                       | 68.770(5)                                                                                              | 100.865(6)                                                                                            |
| Volume, Å <sup>3</sup>        | 723.95(18)                                                                                            | 708.79(10)                                                                                                          | 3357.6(7)                                                                                                                | 1055.1(3)                                                                                              | 745.78(19)                                                                                            |
| Density, g/cm <sup>3</sup>    | 1.515                                                                                                 | 1.402                                                                                                               | 1.434                                                                                                                    | 1.305                                                                                                  | 1.471                                                                                                 |
| <i>T</i> , °K                 | 120(2)                                                                                                | 120(2)                                                                                                              | 120(2)                                                                                                                   | 120(2)                                                                                                 | 120(2)                                                                                                |
| Crystal size, min x mid x max | 0.08 x 0.26 x 0.34                                                                                    | 0.30 x 0.36 x 0.42                                                                                                  | 0.08 x 0.28 x 0.32                                                                                                       | 0.16 x 0.26 x 0.34                                                                                     | 0.18 x 0.26 x 0.32                                                                                    |
| X-ray wavelength, Å           | 0.71073                                                                                               | 0.71073                                                                                                             | 1.54178                                                                                                                  | 1.54178                                                                                                | 1.54178                                                                                               |
| $\mu$ , mm <sup>-1</sup>      | 0.117                                                                                                 | 0.101                                                                                                               | 0.945                                                                                                                    | 0.780                                                                                                  | 0.957                                                                                                 |
| Trans min / max               | 0.9614 / 0.9907                                                                                       | 0.9588 / 0.9703                                                                                                     | 0.7519 / 0.9282                                                                                                          | 0.7773 / 0.8853                                                                                        | 0.7493 / 0.8466                                                                                       |
| $\theta_{min}$ , °            | 1.98                                                                                                  | 2.45                                                                                                                | 2.45                                                                                                                     | 4.94                                                                                                   | 4.67                                                                                                  |
| $\theta_{max}$ , °            | 32.66                                                                                                 | 32.11                                                                                                               | 70.19                                                                                                                    | 69.60                                                                                                  | 68.55                                                                                                 |
| Reflections                   |                                                                                                       |                                                                                                                     |                                                                                                                          |                                                                                                        |                                                                                                       |
| collected                     | 16031                                                                                                 | 15145                                                                                                               | 29624                                                                                                                    | 16331                                                                                                  | 11844                                                                                                 |
| independent                   | 4726                                                                                                  | 4623                                                                                                                | 3060                                                                                                                     | 3704                                                                                                   | 2638                                                                                                  |

|                                                            |                |                |                |                |                |
|------------------------------------------------------------|----------------|----------------|----------------|----------------|----------------|
| observed                                                   | 3644           | 4145           | 2439           | 3399           | 2360           |
| $R_{\text{int}}$                                           | 0.0281         | 0.0213         | 0.0861         | 0.0360         | 0.0392         |
| Threshold expression                                       | $> 2\sigma(I)$ |
| No. parameters                                             | 254            | 205            | 250            | 281            | 226            |
| No. restraints                                             | 0              | 0              | 0              | 0              | 0              |
| $R_1$ (observed)                                           | 0.0448         | 0.0435         | 0.0552         | 0.0378         | 0.0379         |
| $wR_2$ (all)                                               | 0.1305         | 0.1198         | 0.1560         | 0.1052         | 0.1137         |
| Goodness of fit (all)                                      | 1.066          | 0.953          | 1.125          | 1.109          | 1.040          |
| $\rho_{\text{max}}, \rho_{\text{min}}, e \text{ \AA}^{-3}$ | 0.504, -0.375  | 0.367, -0.366  | 0.249, -0.299  | 0.227, -0.179  | 0.200, -0.334  |
| $2\theta$ limit, °                                         | 30.00          | 30.00          | 70.00          | 67.50          | 67.50          |
| Completeness to $2\theta$ limit                            | 0.992          | 0.982          | 0.963          | 0.96           | 0.974          |

| Code                          | <b>3,3:Dod.H<sub>2</sub>O</b>                                                                                                 | <b>3,4:Glu.2 H<sub>2</sub>O</b>                                                                                                       | <b>4,2:Sub.2 H<sub>2</sub>O</b>                                                                                                                        | <b>3,3:Seb.H<sub>2</sub>O</b>                                                                                                 | <b>4,2:Adp.2 H<sub>2</sub>O</b>                                                                                                                        |
|-------------------------------|-------------------------------------------------------------------------------------------------------------------------------|---------------------------------------------------------------------------------------------------------------------------------------|--------------------------------------------------------------------------------------------------------------------------------------------------------|-------------------------------------------------------------------------------------------------------------------------------|--------------------------------------------------------------------------------------------------------------------------------------------------------|
| Formula moiety                | (C <sub>12</sub> H <sub>10</sub> N <sub>4</sub> O)<br>(C <sub>12</sub> H <sub>22</sub> O <sub>4</sub> )<br>(H <sub>2</sub> O) | (C <sub>12</sub> H <sub>10</sub> N <sub>4</sub> O)<br>(C <sub>5</sub> H <sub>8</sub> O <sub>4</sub> ) (H <sub>2</sub> O) <sub>2</sub> | (C <sub>12</sub> H <sub>10</sub> N <sub>4</sub> O) <sub>2</sub><br>(C <sub>8</sub> H <sub>14</sub> O <sub>4</sub> )<br>(H <sub>2</sub> O) <sub>2</sub> | (C <sub>12</sub> H <sub>10</sub> N <sub>4</sub> O)<br>(C <sub>10</sub> H <sub>18</sub> O <sub>4</sub> )<br>(H <sub>2</sub> O) | (C <sub>12</sub> H <sub>10</sub> N <sub>4</sub> O) <sub>2</sub><br>(C <sub>6</sub> H <sub>10</sub> O <sub>4</sub> )<br>(H <sub>2</sub> O) <sub>2</sub> |
| Empirical formula             | C <sub>24</sub> H <sub>34</sub> N <sub>4</sub> O <sub>6</sub>                                                                 | C <sub>17</sub> H <sub>22</sub> N <sub>4</sub> O <sub>7</sub>                                                                         | C <sub>32</sub> H <sub>38</sub> N <sub>8</sub> O <sub>8</sub>                                                                                          | C <sub>22</sub> H <sub>30</sub> N <sub>4</sub> O <sub>6</sub>                                                                 | C <sub>30</sub> H <sub>34</sub> N <sub>8</sub> O <sub>8</sub>                                                                                          |
| Molecular weight              | 474.55                                                                                                                        | 394.39                                                                                                                                | 662.70                                                                                                                                                 | 446.50                                                                                                                        | 634.65                                                                                                                                                 |
| Color, Habit                  | Colorless, Plate                                                                                                              | Colorless, Prism                                                                                                                      | Colorless, Prism                                                                                                                                       | Colorless, Plate                                                                                                              | Colorless, Plate                                                                                                                                       |
| Crystal system                | Triclinic                                                                                                                     | Triclinic                                                                                                                             | Triclinic                                                                                                                                              | Triclinic                                                                                                                     | Triclinic                                                                                                                                              |
| Space group, Z                | <i>P</i> $\bar{1}$ , 2                                                                                                        | <i>P</i> $\bar{1}$ , 4                                                                                                                | <i>P</i> $\bar{1}$ , 1                                                                                                                                 | <i>P</i> $\bar{1}$ , 4                                                                                                        | <i>P</i> $\bar{1}$ , 1                                                                                                                                 |
| <i>a</i> , Å                  | 6.9300(8)                                                                                                                     | 10.9929(10)                                                                                                                           | 6.6774(11)                                                                                                                                             | 6.9504(10)                                                                                                                    | 6.5986(6)                                                                                                                                              |
| <i>b</i> , Å                  | 7.8773(10)                                                                                                                    | 11.4742(10)                                                                                                                           | 8.2196(14)                                                                                                                                             | 14.170(2)                                                                                                                     | 8.0173(8)                                                                                                                                              |
| <i>c</i> , Å                  | 24.680(3)                                                                                                                     | 16.1087(14)                                                                                                                           | 15.972(3)                                                                                                                                              | 23.788(3)                                                                                                                     | 15.3396(14)                                                                                                                                            |
| $\alpha$ , °                  | 85.562(6)                                                                                                                     | 102.095(3)                                                                                                                            | 81.888(7)                                                                                                                                              | 79.555(9)                                                                                                                     | 97.862(4)                                                                                                                                              |
| $\beta$ , °                   | 83.394(6)                                                                                                                     | 108.567(4)                                                                                                                            | 83.771(8)                                                                                                                                              | 84.610(8)                                                                                                                     | 101.861(3)                                                                                                                                             |
| $\gamma$ , °                  | 66.198(5)                                                                                                                     | 95.615(3)                                                                                                                             | 74.805(7)                                                                                                                                              | 89.821(9)                                                                                                                     | 104.541(3)                                                                                                                                             |
| Volume, Å <sup>3</sup>        | 1223.8(3)                                                                                                                     | 1853.4(3)                                                                                                                             | 835.2(2)                                                                                                                                               | 2293.7(6)                                                                                                                     | 753.39(12)                                                                                                                                             |
| Density, g/cm <sup>3</sup>    | 1.288                                                                                                                         | 1.413                                                                                                                                 | 1.318                                                                                                                                                  | 1.293                                                                                                                         | 1.399                                                                                                                                                  |
| <i>T</i> , °K                 | 120(2)                                                                                                                        | 120(2)                                                                                                                                | 120(2)                                                                                                                                                 | 180(2)                                                                                                                        | 120(2)                                                                                                                                                 |
| Crystal size, min x mid x max | 0.12 x 0.28 x 0.32                                                                                                            | 0.14 x 0.26 x 0.38                                                                                                                    | 0.16 x 0.22 x 0.32                                                                                                                                     | 0.12 x 0.20 x 0.28                                                                                                            | 0.10 x 0.24 x 0.44                                                                                                                                     |
| X-ray wavelength, Å           | 1.54178                                                                                                                       | 0.71073                                                                                                                               | 1.54178                                                                                                                                                | 1.54178                                                                                                                       | 0.71073                                                                                                                                                |
| $\mu$ , mm <sup>-1</sup>      | 0.767                                                                                                                         | 0.111                                                                                                                                 | 0.804                                                                                                                                                  | 0.787                                                                                                                         | 0.104                                                                                                                                                  |
| Trans min / max               | 0.7913 / 0.9135                                                                                                               | 0.9590 / 0.9846                                                                                                                       | 0.7829 / 0.8821                                                                                                                                        | 0.8097 / 0.9115                                                                                                               | 0.9557 / 0.9897                                                                                                                                        |
| $\theta_{min}$ , °            | 1.80                                                                                                                          | 1.38                                                                                                                                  | 2.80                                                                                                                                                   | 1.90                                                                                                                          | 1.38                                                                                                                                                   |
| $\theta_{max}$ , °            | 67.72                                                                                                                         | 32.60                                                                                                                                 | 68.58                                                                                                                                                  | 68.58                                                                                                                         | 33.17                                                                                                                                                  |
| Reflections                   |                                                                                                                               |                                                                                                                                       |                                                                                                                                                        |                                                                                                                               |                                                                                                                                                        |
| collected                     | 16550                                                                                                                         | 37645                                                                                                                                 | 13228                                                                                                                                                  | 36604                                                                                                                         | 18394                                                                                                                                                  |
| independent                   | 4136                                                                                                                          | 11890                                                                                                                                 | 2996                                                                                                                                                   | 8223                                                                                                                          | 5103                                                                                                                                                   |

|                                                            |                |                |                |                |                |
|------------------------------------------------------------|----------------|----------------|----------------|----------------|----------------|
| observed                                                   | 3787           | 7481           | 2754           | 5569           | 4166           |
| $R_{\text{int}}$                                           | 0.0359         | 0.0491         | 0.0354         | 0.0802         | 0.0224         |
| Threshold expression                                       | $> 2\sigma(I)$ |
| No. parameters                                             | 322            | 548            | 229            | 605            | 220            |
| No. restraints                                             | 0              | 0              | 0              | 0              | 0              |
| $R_1$ (observed)                                           | 0.0452         | 0.0580         | 0.0390         | 0.0764         | 0.0426         |
| $wR_2$ (all)                                               | 0.1187         | 0.1839         | 0.1069         | 0.2466         | 0.1329         |
| Goodness of fit (all)                                      | 1.064          | 1.054          | 1.047          | 1.447          | 1.058          |
| $\rho_{\text{max}}, \rho_{\text{min}}, e \text{ \AA}^{-3}$ | 0.416, -0.265  | 0.528, -0.389  | 0.447, -0.286  | 0.199, -0.316  | 0.414, -0.260  |
| $2\theta$ limit, °                                         | 67.50          | 30.00          | 67.50          | 67.50          | 30.00          |
| Completeness to $2\theta$ limit                            | 0.934          | 0.98           | 0.986          | 0.985          | 0.999          |

| Code              | <b>2,3:Glu</b>                                                                                        | <b>4,2:Azl.2 H<sub>2</sub>O</b>                                                                                                                        | <b>2,3:Pim</b>                                                                                         |
|-------------------|-------------------------------------------------------------------------------------------------------|--------------------------------------------------------------------------------------------------------------------------------------------------------|--------------------------------------------------------------------------------------------------------|
| Formula moiety    | (C <sub>12</sub> H <sub>10</sub> N <sub>4</sub> O)<br>(C <sub>5</sub> H <sub>8</sub> O <sub>4</sub> ) | (C <sub>12</sub> H <sub>10</sub> N <sub>4</sub> O) <sub>2</sub><br>(C <sub>9</sub> H <sub>16</sub> O <sub>4</sub> )<br>(H <sub>2</sub> O) <sub>2</sub> | (C <sub>12</sub> H <sub>10</sub> N <sub>4</sub> O)<br>(C <sub>7</sub> H <sub>12</sub> O <sub>4</sub> ) |
| Empirical formula | C <sub>17</sub> H <sub>18</sub> N <sub>4</sub> O <sub>5</sub>                                         | C <sub>33</sub> H <sub>40</sub> N <sub>8</sub> O <sub>8</sub>                                                                                          | C <sub>19</sub> H <sub>22</sub> N <sub>4</sub> O <sub>5</sub>                                          |
| Molecular weight  | 358.35                                                                                                | 676.73                                                                                                                                                 | 386.41                                                                                                 |
| Color, Habit      | Colorless, Plate                                                                                      | Colorless, Plate                                                                                                                                       | Colorless, Plate                                                                                       |
| Crystal system    | Monoclinic                                                                                            | Monoclinic                                                                                                                                             | Monoclinic                                                                                             |
| Space group, $Z$  | $P2(1)/c$ , 4                                                                                         | $P2(1)/c$ , 4                                                                                                                                          | $P2(1)/c$ , 4                                                                                          |
| $a$ , Å           | 20.694(3)                                                                                             | 36.802(8)                                                                                                                                              | 5.5981(7)                                                                                              |
| $b$ , Å           | 5.5714(8)                                                                                             | 7.2815(14)                                                                                                                                             | 45.389(5)                                                                                              |
| $c$ , Å           | 14.954(2)                                                                                             | 12.533(3)                                                                                                                                              | 7.3036(8)                                                                                              |
| $\alpha$ , °      | 90                                                                                                    | 90                                                                                                                                                     | 90                                                                                                     |

|                                              |                       |                       |                       |
|----------------------------------------------|-----------------------|-----------------------|-----------------------|
| $\beta$ , °                                  | 105.047(7)            | 92.978(8)             | 98.469(5)             |
| $\gamma$ , °                                 | 90                    | 90                    | 90                    |
| Volume, Å <sup>3</sup>                       | 1665.0(4)             | 3354.1(13)            | 1835.5(4)             |
| Density, g/cm <sup>3</sup>                   | 1.430                 | 1.340                 | 1.398                 |
| $T$ , °K                                     | 120(2)                | 120(2)                | 120(2)                |
| Crystal size, min<br>x mid x max             | 0.10 x 0.22 x<br>0.40 | 0.10 x 0.36 x<br>0.40 | 0.06 x 0.28 x<br>0.36 |
| X-ray<br>wavelength, Å                       | 0.71073               | 0.71073               | 0.71073               |
| $\mu$ , mm <sup>-1</sup>                     | 0.108                 | 0.098                 | 0.103                 |
| Trans min / max                              | 0.9582 / 0.9893       | 0.9619 / 0.9903       | 0.9638 / 0.9938       |
| $\theta_{min}$ , °                           | 1.02                  | 1.11                  | 2.86                  |
| $\theta_{max}$ , °                           | 31.51                 | 31.56                 | 32.11                 |
| Reflections                                  |                       |                       |                       |
| collected                                    | 24390                 | 68658                 | 31436                 |
| independent                                  | 5305                  | 10990                 | 5805                  |
| observed                                     | 3401                  | 8106                  | 4314                  |
| $R_{int}$                                    | 0.0850                | 0.0552                | 0.0406                |
| Threshold<br>expression                      | $> 2\sigma(I)$        | $> 2\sigma(I)$        | $> 2\sigma(I)$        |
| No. parameters                               | 244                   | 494                   | 259                   |
| No. restraints                               | 0                     | 37                    | 0                     |
| $R_1$ (observed)                             | 0.0703                | 0.0995                | 0.0557                |
| $wR_2$ (all)                                 | 0.2140                | 0.3093                | 0.1558                |
| Goodness of fit<br>(all)                     | 1.216                 | 2.015                 | 1.048                 |
| $\rho_{max}, \rho_{min}$ , e Å <sup>-3</sup> | 0.531, -0.550         | 0.737, -0.486         | 0.566, -0.269         |
| $2\theta$ limit, °                           | 30.00                 | 31.56                 | 29.00                 |
| Completeness to<br>$2\theta$ limit           | 0.99                  | 0.978                 | 0.943                 |

### Crystallography Experimental Details

Datasets were collected on a Bruker Kappa APEX II system using CuK $\alpha$  radiation (**3,4:Suc.H<sub>2</sub>O**; **2,3:Azl**; **2,3:Mal**; **3,3:Dod.H<sub>2</sub>O**; **4,2:Sub.2 H<sub>2</sub>O**; **3,3:Seb.H<sub>2</sub>O**), or on a Bruker APEX II system using MoK $\alpha$  radiation (**3,4:Mal**; **2,3:Adp**; **3,4:Glu.2 H<sub>2</sub>O**; **4,2:Adp.2 H<sub>2</sub>O**; **2,3:Glu**; **4,2:Azl.2 H<sub>2</sub>O**; **2,3:Pim**). Data were collected using APEX2 software.<sup>i</sup> Initial cell constants were found by small widely separated “matrix” runs. Data collection strategies were determined using COSMO.<sup>ii</sup> Scan speed and scan widths were chosen based on scattering power and peak rocking curves. All datasets except **3,3:Seb.H<sub>2</sub>O** (-93 °C) were collected at -153 °C using an Oxford Cryostream low-temperature device.

Unit cell constants and orientation matrix were improved by least-squares refinement of reflections thresholded from the entire dataset. Integration was performed with SAINT,<sup>iii</sup> using this improved unit cell as a starting point. Precise unit cell constants were calculated in SAINT from the final merged dataset. Lorenz and polarization corrections were applied. Multi-scan absorption corrections were performed with SADABS.<sup>iv</sup>

Data were reduced with SHELXTL.<sup>v</sup> The structures were solved in all cases by direct methods without incident. Except as noted, hydrogen atoms were located in idealized positions and were treated with a riding model. All non-hydrogen atoms were assigned anisotropic thermal parameters. Refinements continued to convergence, using the recommended weighting schemes.

**3,4:Mal**: Part of the dicarboxylic acid molecule is disordered over two closely related positions, representing wobble around the C-C bond. Thermal parameters were pairwise constrained using the EADP command. Coordinates of the amide hydrogen atom H17 and the carboxylic acid hydrogen atom H31 were allowed to refine.

**2,3:Adp**: Coordinates of the amide hydrogen atom H17 and the carboxylic acid hydrogen atom H31 were allowed to refine.

**3,4:Suc.H<sub>2</sub>O**: Coordinates of the amide hydrogen atom H17, the carboxylic acid hydrogen atoms H31 and H34, and the water molecule hydrogen atoms H1A and H1B were allowed to refine.

**2,3:Azl**: Coordinates of the amide hydrogen atom H17 and the carboxylic acid hydrogen atoms H31 and H39 were allowed to refine.



**2,3:Mal:** Coordinates of the amide hydrogen atom H17 and the carboxylic acid hydrogen atoms H31 and H33 were allowed to refine.

**3,3:Dod.H<sub>2</sub>O:** Coordinates of the amide hydrogen atom H17, the carboxylic acid hydrogen atoms H31 and H42, and the water molecule hydrogen atoms H1A and H1B were allowed to refine.

**3,4:Glu.2 H<sub>2</sub>O:** Coordinates of the amide hydrogen atoms H17\_1 and H17\_2, the carboxylic acid hydrogen atoms H31\_1, H31\_2, H35\_1 and H35\_2, and the water molecule hydrogen atoms H1A\_1, H1B\_1, H2A\_1, H2B\_1, H3A\_2, H3B\_2, H4A\_2 and H4B\_2 were allowed to refine.

**4,2:Sub.2 H<sub>2</sub>O:** Coordinates of the amide hydrogen atom H17, the carboxylic acid hydrogen atom H31, and the water molecule hydrogen atoms H1A and H1B were allowed to refine.

**3,3:Seb.H<sub>2</sub>O:** The asymmetric unit contains two molecules each of the pyridine-based ligand, aliphatic dicarboxylic acid and water. One of the pyridine-based ligand molecules is disordered. The same coordinates have been utilized for atoms occupying the same site using the EXYZ command. Thermal parameters for closely located atoms were pairwise constrained using the EADP command. Coordinates of the amide hydrogen atoms H17\_1 and H17\_2, the carboxylic acid hydrogen atoms H31\_1, H40\_1, H31\_2 and H40\_2, and the water molecule hydrogen atoms H1A\_1, H1B\_1, H1A\_2 and H1B\_2 were allowed to refine.

**4,2:Adp.2 H<sub>2</sub>O:** Coordinates of the amide hydrogen atom H17, the carboxylic acid hydrogen atom H31, and the water molecule hydrogen atoms H1A and H1B were allowed to refine.

**2,3:Glu:** Coordinates of the amide hydrogen atom H17 and the carboxylic acid hydrogen atoms H31 and H35 were allowed to refine.

**4,2:Azl.2 H<sub>2</sub>O:** The asymmetric unit contains two molecules each of the pyridine-based ligand and water along with one molecule of the aliphatic dicarboxylic acid. The entire aliphatic dicarboxylic acid molecule is disordered over two closely related positions, thus representing different orientations. Relative populations were allowed to refine. Thermal parameters were pairwise constrained using EADP commands. Geometry of the aliphatic carbon chain was restrained using the SAME command. The bond distances were fixed to idealized distances using the DFIX command. Coordinates of the amide hydrogen atoms H17 and H37, the carboxylic acid

hydrogen atom H51, and the water molecule hydrogen atoms H1A, H1B, H2A and H2B were allowed to refine.

**2,3:Pim:** Coordinates of the amide hydrogen atom H17 and the carboxylic acid hydrogen atoms H31 and H37 were allowed to refine.

- 
- i APEX2 v2013.10-0, © 2013, Bruker Analytical X-ray Systems, Madison, WI.
  - ii COSMO v1.61, © 1999 - 2009, Bruker Analytical X-ray Systems, Madison, WI.
  - iii SAINT v8.34a, © 1997 - 2013, Bruker Analytical X-ray Systems, Madison, WI.
  - iv SADABS v2012/1, © 2012, Bruker Analytical X-ray Systems, Madison, WI.
  - v SHELXTL v2008/4, © 2008, Bruker Analytical X-ray Systems, Madison, WI.
